# Supplementary material for: Mobile Apps for Blood Pressure Monitoring: Systematic Search in App Stores and Content Analysis
Source: PubMed Central journal article supplement (PMC6262205; doi:10.2196/mhealth.9888), 2018-11-14
Supplement: mhealth_v6i11e187_app1.pdf [file mhealth_v6i11e187_app1.pdf]

| Platform | App name                       | App developer                         | MARS overall score |
|----------|--------------------------------|---------------------------------------|--------------------|
| Android  | Bewaken Mijn BP                | APG Solutions, LLC                    | 2.0                |
| Android  | Bloeddruk Inloggen             | Aronegy                               | 2.1                |
| Android  | Bloeddruk Log Dagboek          | PureStyle360                          | 2.7                |
| Android  | Blood Pressure                 | Bemo Apps                             | 2.4                |
| Android  | Blood Pressure                 | Freshware                             | 2.8                |
| Android  | Blood Pressure                 | Gennaro Guarino                       | 2.4                |
| Android  | Blood Pressure - Heartcare     | Aman Shivhare                         | 3.1                |
| Android  | Blood Pressure (BP) Report     | TriStarApps                           | 2.5                |
| Android  | Blood Pressure (BP) Watch      | NumbersMatter2Me                      | 3.2                |
| Android  | Blood Pressure (SmartBP)       | Evolve Medical Systems                | 3.1                |
| Android  | Blood Pressure Dairy           | Ser                                   | 2.2                |
| Android  | Blood Pressure Dairy           | Umbrella Corp Android                 | 2.6                |
| Android  | Blood Pressure Diary           | FRUCT                                 | 2.9                |
| Android  | Blood Pressure Down            | Calories LLC                          | 2.4                |
| Android  | Blood Pressure Journal         | 3qubits                               | 3.3                |
| Android  | Blood Pressure Log             | jucdejeb                              | 2.9                |
| Android  | Blood Pressure Log - MyDiary   | Dr Tomasz Jan Zlamaniec               | 3.3                |
| Android  | Blood Pressure Log - Trial     | Sgadan Creek Software                 | 2.1                |
| Android  | Blood Pressure Logger          | Daffodil Technologies (I) Pvt Ltd     | 2.7                |
| Android  | Blood Pressure Logger          | Time2Relax                            | 2.3                |
| Android  | Blood Pressure Logger (Health) | Pixelogic Apps                        | 2.7                |
| Android  | Blood Pressure manager         | (?_*)???                              | 2.0                |
| Android  | Blood Pressure Meds SciTracker | Justin Taylor Dev                     | 3.1                |
| Android  | Blood pressure memo            | Mirko Martinović                      | 2.4                |
| Android  | Blood Pressure Monitor Diary   | Boost Developers                      | 2.3                |
| Android  | Blood Pressure Monitoring      | Juan B and Juan H Android Development | 2.3                |
| Android  | Blood Pressure QuickLog.me     | Genehome                              | 2.5                |
| Android  | Blood Pressure Record free     | Kmcpesh apps                          | 2.5                |
| Android  | Blood Pressure Records         | Allan Mosiro                          | 2.2                |
| Android  | Blood Pressure Tab             | Catimos                               | 2.5                |
| Android  | Blood Pressure Tracker         | aadhk                                 | 3.1                |
| Android  | Blood Pressure Tracker         | California Healthcom Group            | 2.3                |
| Android  | Blood Pressure Tracker         | Refael Sheinker                       | 2.5                |
| Android  | Blood Pressure Tracker         | Sparkle Solutions                     | 1.7                |
| Android  | BLOOD PRESSURE TRACKER SYSTEM  | Cyblance Technologies Private Limited | 2.6                |
| Android  | Blood Pressure(BP) Diary       | Cufit Inc.                            | 3.0                |
| Android  | BloodPressure Vue              | vue                                   | 3.0                |
| Android  | BloodPressureDB                | Horst Klier                           | 2.6                |
| Android  | Bluetooth Blood Pressure       | IdeaSynthesis LLC                     | 2.3                |
| Android  | BP Log Tracker                 | Abhisoft Tech                         | 2.5                |
| Android  | BP Tracker-Symptoms & Solution | Droid Studio India                    | 2.7                |
| Android  | BPMonitor                      | NowPos                                | 2.5                |
| Android  | C.A.P.D. Helper                | eeighon                               | 2.7                |
| Android  | Cardio Journal blood pressure  | MDHELPER                              | 3.3                |
| Android  | Cardiograph diary pro          | Double A Developers                   | 2.2                |

|         |                                |                                          |     |
|---------|--------------------------------|------------------------------------------|-----|
| Android | DailyChek Cardio Health Free   | hlmt rd                                  | 2.9 |
| Android | dbees.com Diabetes Management  | Freshware                                | 2.3 |
| Android | Diabetes & Blood Pressure Log  | Cooley Technologies                      | 2.4 |
| Android | Diabetes BP Health Tracker App | Justin Taylor Dev                        | 2.6 |
| Android | Digital Cardiograph diary pro  | Double A Developers                      | 2.4 |
| Android | Dr. Mohan's Diabetes App       | Jana Care                                | 2.7 |
| Android | Easy Blood Pressure Diary      | SILECI Apps                              | 2.9 |
| Android | EHR / EMR Health records       | AvvaStyle                                | 2.6 |
| Android | eHypertension Pro free         | Physiosensing, Inc                       | 2   |
| Android | EZ Health Tracker              | Ed Avoundjian                            | 2.4 |
| Android | Fitga Fitness Tracker          | KyaliApps                                | 2.2 |
| Android | GO - Gezondheid & Geschiktheid | DROID INFINITY                           | 2.8 |
| Android | Habits: Diabetes Coach         | Jana Care                                | 2.7 |
| Android | Health Assistant               | WSMRSOFT                                 | 2.9 |
| Android | Health Diary                   | ORIN                                     | 2.6 |
| Android | Health Diary                   | PNN Soft                                 | 2.8 |
| Android | Health Manager "Healthiern"    | Kawashore                                | 2.2 |
| Android | Health Master Free             | GreenLife Apps                           | 2.4 |
| Android | Health Mate                    | Withings                                 | 2.7 |
| Android | Health Measure Graph           | Soft Industry                            | 2.7 |
| Android | Health Report Daily            | Elapse Technologies                      | 2.5 |
| Android | Health Tracker & Manager App   | XLabz Technologies Pvt Ltd               | 3.2 |
| Android | Health Tracking - Pow Health   | Pow Health                               | 2.6 |
| Android | Health-PIE Digital Nurse       | mTatva - Health App & Fitness App        | 2.8 |
| Android | Health-Tracker                 | Lior Ben Oved                            | 2.8 |
| Android | HealthWatch 360                | GB HealthWatch                           | 3.1 |
| Android | Heart Manager                  | BlueBird Apps                            | 2.8 |
| Android | Heartkeeper                    | Grupo de Telemedicina y eSalud de la UVA | 2.7 |
| Android | Heartservice                   | Kenkou                                   | 2.6 |
| Android | iBP Blood Pressure             | Leading Edge Apps LLC                    | 3.0 |
| Android | Logboek bloeddruk              | bplog.it                                 | 2.7 |
| Android | Medilio                        | Casperise                                | 2.8 |
| Android | Medische geschiedenis dossiers | xHealth                                  | 2.8 |
| Android | MedM Blood Pressure            | MedM Inc                                 | 3.3 |
| Android | MedM Health                    | MedM Inc                                 | 2.6 |
| Android | Mijn Bloeddruk                 | 3 ACORN Technologies, LLC                | 1.6 |
| Android | My Blood Pressure              | Konviere Corporation                     | 2.4 |
| Android | My Blood Pressure              | Mengtao Ye                               | 2.7 |
| Android | My Blood Pressure & Heart Rate | Webpatient                               | 2.3 |
| Android | My Health Tracker              | Walter Gross                             | 2.5 |
| Android | myBloodPressure Free           | Arbitrary Software LLC                   | 2.7 |
| Android | Pocket Health Tracker          | wide apps                                | 2.6 |
| Android | Pressure log                   | X64h                                     | 2.2 |
| Android | Pressure Monitor               | And Developer                            | 2.3 |
| Android | PressureLog                    | apps4use                                 | 2.5 |
| Android | S Health                       | Samsung Electronics Co., Ltd.            | 3.4 |

|         |                                                                                                      |                              |     |
|---------|------------------------------------------------------------------------------------------------------|------------------------------|-----|
| Android | Sanitas HealthCoach                                                                                  | Hans Dinslage GmbH           | 3.2 |
| Android | Simple Blood Pressure Tracking                                                                       | TheTracker                   | 1.8 |
| Android | TactioGezondheid                                                                                     | Tactio Health Group          | 3.1 |
| Android | AppVita                                                                                              | AViTA Corp.                  | 2.3 |
| Android | Beurer HealthManager                                                                                 | Beurer GmbH                  | 3.7 |
| Android | Bloed dagboeken                                                                                      | EONSOFT                      | 2.5 |
| Android | Bloeddruk                                                                                            | Klimaszewski Szymon          | 4.1 |
| Android | Blood Pressure Diary                                                                                 | LABC FACTORY                 | 2.3 |
| Android | Blood Pressure Diary                                                                                 | Mobispin                     | 2.3 |
| Android | Blood Pressure Diary                                                                                 | OrangeOlive                  | 2.6 |
| Android | Blood pressure diary - free!                                                                         | Androcalc                    | 2.6 |
| Android | blood pressure healthy                                                                               | tdtomlou                     | 2.4 |
| Android | ContinuousCare Health App                                                                            | NeedStreet                   | 2.9 |
| iOS     | AMICOMED BP                                                                                          | AMICOMED                     | 3.6 |
| iOS     | Braun Healthy Heart                                                                                  | Kaz USA, Inc.                | 3.5 |
| iOS     | Blood Pressure                                                                                       | Evolve Medical Systems, LLC  | 3.3 |
| iOS     | Beurer HealthManager                                                                                 | Beurer GmbH                  | 3.3 |
| iOS     | Health Mate - Steps tracker & Life coach door Withings                                               | Withings                     | 3.2 |
| iOS     | AGR Blood Pressure Log                                                                               | angel garcia rubio           | 3.1 |
| iOS     | HeartStar Blood Pressure Monitor                                                                     | Little Green Software        | 3.1 |
| iOS     | iBP Blood Pressure                                                                                   | Leading Edge Apps LLC        | 3.1 |
| iOS     | Health Tracker & Manager for iPhone - Personal Healthbook App for Tracking Blood Pressure BP, Glucos | XLabz Technologies Pvt. Ltd. | 3.0 |
| iOS     | Blood Pressure Monitor - Family Lite                                                                 | Taconic System LLC           | 3.0 |
| iOS     | Blood Pressure Logger                                                                                | suprabhat chouksey           | 3.0 |
| iOS     | Bloeddrukmeter FREE                                                                                  | Dzmitry Permiakou            | 2.9 |
| iOS     | BPMon - Blood Pressure Monitor                                                                       | Anatoly Butko                | 2.9 |
| iOS     | Bloody Pressure                                                                                      | Piotr Sochalewski            | 2.9 |
| iOS     | Sanitas HealthCoach                                                                                  | Hans Dinslage GmbH           | 2.9 |
| iOS     | BodyGauge                                                                                            | Martin Edelbroek             | 2.9 |
| iOS     | Best Blood Pressure Monitor                                                                          | Andrei Mitrohin              | 2.9 |
| iOS     | Blood Pressure Monitor - Cloud Edition                                                               | Thomas Kress                 | 2.9 |
| iOS     | MedM Blood Pressure                                                                                  | SwissMed Mobile AG           | 2.9 |
| iOS     | Cardio+                                                                                              | Microlife Corp.              | 2.8 |
| iOS     | Blood Pressure Tracker QuickLog.me                                                                   | Genehome                     | 2.8 |
| iOS     | Daily Carb - Carbohydrate, Glucose, Medication, Blood Pressure and Exercise Tracker                  | Maxwell Software             | 2.8 |
| iOS     | Bloeddruk Assistent - Bloeddrukmetingen registreren en bijhouden                                     | Josef Moser                  | 2.8 |
| iOS     | BP Wiz – Blood Pressure Log and Medication Tracker                                                   | LINKLINKS LTD                | 2.8 |

|     |                                                                                                      |                               |      |
|-----|------------------------------------------------------------------------------------------------------|-------------------------------|------|
| iOS | Kang BP                                                                                              | kangkang                      | 2.8  |
| iOS | Chart My BP - Blood Pressure Tracker                                                                 | APPSTRUCTURE LLC              | 2.8  |
| iOS | Bloodnote - Blood pressure control                                                                   | Matt Ludzen and Peter Bajtala | 2.8  |
| iOS | Blood Pressure Companion                                                                             | Maxwell Software              | 2.7  |
| iOS | Body Logger                                                                                          | Jerry Juang                   | 2.7  |
| iOS | Blood Pressure Track                                                                                 | Feeltracker Ltd               | 2.7  |
| iOS | Control Tension                                                                                      | Les Laboratoires Servier      | 2.7  |
| iOS | Tactio Gezondheid: Mijn Aangesloten Gezondheid Logboek                                               | Tactio Health Group Inc.      | 2.7  |
| iOS | HoMedics                                                                                             | HoMedics                      | 2.7  |
| iOS | Diabetes Pedometer with Glucose & Food Diary, Weight Tracker, Blood Pressure Log and Medication Remi | Pacer Health, Inc             | 2.7  |
| iOS | Glucose Buddy Pro : Diabetes Managing Logbook w/ Blood Pressure & Weight Tracking                    | Azumio Inc.                   | 2.7  |
| iOS | Blood Pressure Logger (Quick & Simple Series)                                                        | Wonho Park                    | 2.7  |
| iOS | Bloeddruk Bijhouden                                                                                  | Japps                         | 2.6  |
| iOS | myBloodPressure                                                                                      | Arbitrary Software, LLC.      | 2.6  |
| iOS | bp Trax® – Blood Pressure Treatment Tracker, Lifestyle, Resting, BMI, MAP, Pulse Rate                | iMobLife Inc.                 | 2.6  |
| iOS | Blood Pressure Tracker - Pro Version                                                                 | iHealth Ventures LLC.         | 2.6  |
| iOS | iHeart - Pulse Reader                                                                                | Anatoly Butko                 | 2.6  |
| iOS | Blood Pressure & Pulse Diary                                                                         | Jan-Hendrik Damerau           | 2.6  |
| iOS | myDiabetes                                                                                           | Urban E-Learning Pty Ltd      | 2.6  |
| iOS | Blood Pressure Logs                                                                                  | Appicasso                     | 2.6  |
| iOS | iCardio GPS, Run, Walk, Bike and Exercise Heart Rate Calorie Monitor and Health Fitbit Tracker       | iTMP Technology, INc.         | 2.6  |
| iOS | myVitali Gezondheidscoach - Vergelijk Fitness en Activiteit                                          | myVitali AG                   | 2.6  |
| iOS | Easy BP                                                                                              | Moonstone Apps                | 2.6  |
| iOS | BloodRate                                                                                            | Ken Madsen                    | 2.56 |
| iOS | Blood Pressure                                                                                       | Bartholomaeus Maciag          | 2.5  |
| iOS | Laborom - diabetes, bloed druk logboek                                                               | xHealth                       | 2.5  |
| iOS | Reframe Health Center - For patients with chronic diseases                                           | Reframe                       | 2.5  |
| iOS | BP Buddy - 80% OFF SALE - Blood Pressure helper                                                      | Azumio Inc.                   | 2.5  |
| iOS | 120 over 80                                                                                          | Jeffrey Kempster              | 2.5  |
| iOS | Your Blood Pressure                                                                                  | WWW Machealth Pty Ltd         | 2.5  |
| iOS | BP Recorder                                                                                          | Cappable Limited              | 2.5  |
| iOS | MyDASHDiet                                                                                           | Fresh Object Software         | 2.5  |

|     |                                                                                                      |                            |     |
|-----|------------------------------------------------------------------------------------------------------|----------------------------|-----|
| iOS | Blood Pressure Monitoring for Pregnancy                                                              | Incentivated               | 2.5 |
| iOS | My Blood Pressure Readings                                                                           | Puig Labs                  | 2.5 |
| iOS | Diabetes Kit Blood Glucose Logbook - Burn Calories & Lower Sugar Levels with Advanced Pedometer Trac | Diabetes Labs, LLC         | 2.4 |
| iOS | Quick BP                                                                                             | Evocomputing Inc.          | 2.4 |
| iOS | Easy Blood Pressure                                                                                  | Seaside Apps               | 2.4 |
| iOS | Blood Pressure Monitor                                                                               | Afanche Technologies, Inc. | 2.4 |
| iOS | GenieMD                                                                                              | GenieMD, LLC               | 2.4 |
| iOS | Gezondheid log keeper                                                                                | A1Brains Infotech          | 2.4 |
| iOS | Blood Pressure Made Easy                                                                             | Chad Dunlap                | 2.4 |
| iOS | Bloed dagboek (Diabetes Management)                                                                  | Seong Eon Kim              | 2.4 |
| iOS | Blood Pressure Passport free                                                                         | ecoTouchMedia.com          | 2.4 |
| iOS | Blood Pressure Down                                                                                  | Calories, LLC              | 2.3 |
| iOS | Easy Blood Pressure Diary                                                                            | SILECI                     | 2.3 |
| iOS | mHypertension                                                                                        | CRT Technology             | 2.3 |
| iOS | Goal Blood Pressure                                                                                  | benjamin hysell            | 2.3 |
| iOS | How Am I Doing Today                                                                                 | Jiajie Li                  | 2.3 |
| iOS | Blood Pressure+Pulse Grapher Lite                                                                    | michael heinz              | 2.3 |
| iOS | Monitor Mijn BP door APG Solutions LLC voor iPhone en iPad                                           | APG Solutions, LLC         | 2.2 |
| iOS | Hypertension & Diabetes                                                                              | eclairMD                   | 2.2 |
| iOS | Live Heart - Blood Pressure measurements with related symptoms                                       | Gabriel Gamil              | 2.1 |
| iOS | Blood Pressure Diary 2                                                                               | cellHigh                   | 2.1 |
| iOS | 120/70: Blood Pressure Logging Helper                                                                | SERGIY SKOBLIKOV           | 2.1 |
| iOS | Simple Blood Pressure Recorder                                                                       | Stack3                     | 2.0 |
| iOS | Blood Pressure Register                                                                              | Manu Gupta                 | 1.8 |
