# Supplementary material for: Mobile Apps for Blood Pressure Monitoring: Systematic Search in App Stores and Content Analysis
Source: PubMed Central journal article supplement (PMC6262205; doi:10.2196/mhealth.9888), 2018-11-14
Supplement: mhealth_v6i11e187_app2.pdf [file mhealth_v6i11e187_app2.pdf]

Multimedia Appendix 2. Top five hypertension apps on the iOS and Android platforms.

| App characteristic              | Android                         |                                    |                                   |                                          |                                | iOS                    |                                    |                                         |                                    |                        |
|---------------------------------|---------------------------------|------------------------------------|-----------------------------------|------------------------------------------|--------------------------------|------------------------|------------------------------------|-----------------------------------------|------------------------------------|------------------------|
|                                 | Bloeddruk (Klimaszewski Szymon) | Beurer HealthManager (Beurer GmbH) | S Health (Samsung Electronics Co) | Cardio Journal blood pressure (MDHELPER) | MedM Blood Pressure (MedM Inc) | AMICOMED BP (AMICOMED) | Braun Healthy Heart (Kaz USA, Inc) | Blood Pressure (Evolve Medical Systems) | Beurer HealthManager (Beurer GmbH) | Health Mate (Withings) |
| <b>MARS overall score</b>       | 4.1                             | 3.7                                | 3.4                               | 3.3                                      | 3.3                            | 3.6                    | 3.5                                | 3.3                                     | 3.3                                | 3.2                    |
| <b>Pricing</b>                  |                                 |                                    |                                   |                                          |                                |                        |                                    |                                         |                                    |                        |
| Price                           | Free                            | Free                               | Free                              | Free                                     | Free                           | Free                   | Free                               | Free                                    | Free                               | Free                   |
| Ads free                        |                                 | X                                  | X                                 | X                                        | X                              | X                      | X                                  |                                         | X                                  | X                      |
| <b>Personal data</b>            |                                 |                                    |                                   |                                          |                                |                        |                                    |                                         |                                    |                        |
| Age                             | X                               | X                                  |                                   | X                                        | X                              | X                      | X                                  | X                                       | X                                  | X                      |
| Gender                          |                                 | X                                  |                                   | X                                        | X                              | X                      | X                                  | X                                       | X                                  | X                      |
| Height                          |                                 | X                                  | X                                 | X                                        |                                |                        |                                    | X                                       | X                                  | X                      |
| Weight <sup>a</sup>             | X                               | X                                  | X                                 | X                                        |                                |                        | X                                  | X                                       | X                                  | X                      |
| <b>BP measurements</b>          |                                 |                                    |                                   |                                          |                                |                        |                                    |                                         |                                    |                        |
| Side (left or right arm)        | X                               |                                    |                                   |                                          | X                              |                        |                                    | X                                       |                                    |                        |
| Position (e.g., sitting, lying) | X                               |                                    |                                   |                                          | X                              |                        |                                    | X                                       |                                    |                        |
| Date and time <sup>a</sup>      | X                               | X                                  | X                                 | X                                        | X                              | X                      | X                                  | X                                       | X                                  | X                      |
| <b>Other features</b>           |                                 |                                    |                                   |                                          |                                |                        |                                    |                                         |                                    |                        |
| Reminder <sup>a</sup>           | X                               |                                    |                                   | X                                        |                                | X                      | X                                  | X                                       |                                    | X                      |
| Analysis tool <sup>a</sup>      | X                               | X                                  | X                                 | X                                        | X                              | X                      | X                                  | X                                       | X                                  | X                      |
| Data export <sup>a</sup>        | X                               | X                                  | X                                 | X                                        | X                              | X                      | X                                  | X                                       | X                                  | X                      |
| Data upload from BP-meter       |                                 | X                                  |                                   |                                          | X                              | X                      |                                    | X                                       | X                                  | X                      |
| Password protection             |                                 | X                                  | X                                 |                                          | X                              | X                      |                                    |                                         | X                                  | X                      |

<sup>a</sup> Key app features for self-management based on guidelines and literature.
